# Supplementary material for: Neural-network design of Li3VO4/NC fibers toward superior high-rate Li-ion storage
Source: Royal Society of Chemistry journal article supplement (doi:10.1039/d1ta07369a), 2021-01-01
Supplement: d1ta07369a1.pdf [file d1ta07369a1.pdf]

## Neural-network design of $\text{Li}_3\text{VO}_4/\text{NC}$ fibers toward superior high-rate Li-ion storage

Zhen Xu<sup>a</sup>, Dongmei Zhang<sup>a</sup>, Junlin Lu<sup>a</sup>, Cunyuan Pei<sup>a</sup>, Tao Li<sup>b</sup>, Ting Xiao<sup>c</sup>, Shibing Ni<sup>1</sup>

<sup>a</sup>College of Materials and Chemical Engineering, Key Laboratory of Inorganic Nonmetallic Crystalline and Energy Conversion Materials, China Three Gorges University, Yichang, 443002, China.

<sup>b</sup>Analysis and Testing Center, China Three Gorges University, Yichang, 443002, China.

<sup>c</sup>College of Electrical Engineering & New Energy, China Three Gorges University, Yichang, 443002, China.

**Preparation of LVO/NC Fs:** Firstly, 2.5 mmol  $\text{NH}_4\text{VO}_3$ , 7.5 mmol  $\text{LiNO}_3$ , 12.5 mmol  $\text{H}_2\text{C}_2\text{O}_4 \cdot 2\text{H}_2\text{O}$  were added in 10 mL dimethylformamide (DMF) and stirred for 10 min. Then 1.85 g polyvinylpyrrolidone (PVP) with molecular weight of 1, 300, 000 was added and stirred for another 12h. After that, the prepared solution was transferred into a 10 mL syringe with a 0.4 mm stainless-steel nozzle for electrospinning with an ejection rate of  $1.5 \text{ mL h}^{-1}$ . After the electrospinning process, the resultant membranes were dried ( $80^\circ\text{C}$ , 12h). Finally, the as-prepared sample was calcined to  $250^\circ\text{C}$  for 3 h and then sintered at  $600^\circ\text{C}$  for 5h under dynamic  $\text{N}_2$  atmosphere.

**Preparation of LVP/C Fs:** Firstly, 2.5 mmol  $\text{NH}_4\text{VO}_3$ , 3.75 mmol  $\text{H}_3\text{PO}_4$ , 3.75 mmol  $\text{LiNO}_3$ , 12.5 mmol  $\text{H}_2\text{C}_2\text{O}_4 \cdot 2\text{H}_2\text{O}$  were added in 10 mL dimethylformamide (DMF) and stirred for 10 min. Then 1.4 g polyvinylpyrrolidone (PVP) with molecular

---

<sup>1</sup> Corresponding Author 86 717 6397502 E-mail: [shibingni07@126.com](mailto:shibingni07@126.com)

weight of 1, 300, 000 was added and stirred for another 12h. After that, the prepared solution was transferred into a 10 mL syringe with a 0.4 mm stainless-steel nozzle for electrospinning with an ejection rate of 1.5 mL h<sup>-1</sup>. A high voltage of 15 kV was applied by a high-voltage power supply. After the electrospinning process, the resultant membranes were dried (80 °C, 12h). Finally, the as-prepared sample was calcined to 200 °C for 3 h under air and then sintered at 800 °C for 4h under dynamic N<sub>2</sub> atmosphere.

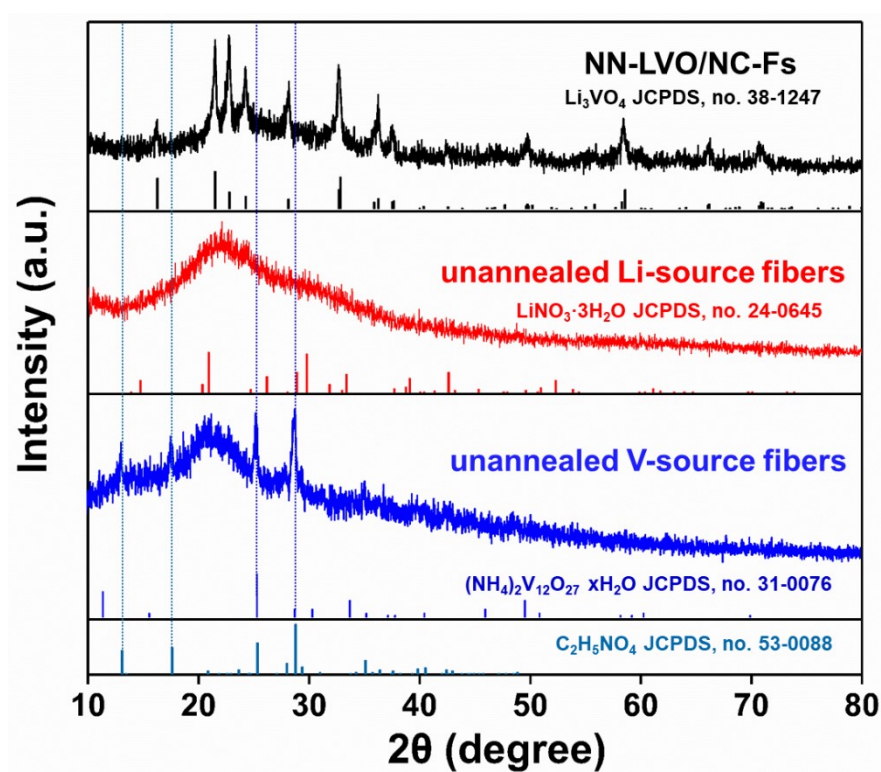

Fig. S1 XRD patterns of the unannealed Li-source (LiNO<sub>3</sub>) fibers and V-source (NH<sub>4</sub>VO<sub>3</sub>) fibers and the NN-LVO/NC-Fs.

As shown in Fig. S1, the Li-source fibers show weak crystallinity, and the V-source fibers indicate NH<sub>4</sub>VO<sub>3</sub> decomposes to a certain extent during electrospinning and drying. It is clear that the diffraction peaks of the unannealed Li-source and V-source fibers differ much from those of the NN-LVO/NC-Fs. As shown in Tab. S1, the

weight of the final NN-LVO/NC-Fs is 0.5191 g. According to the LVO content in the NN-LVO/NC-Fs (~51.3%, Fig. 2c), it could be deduced that the obtained LVO is 0.2663 g. Compared with the theoretical weight of the LVO (2.5 mmol, 0.34 g), the transformation efficiency from the Li-source ( $\text{LiNO}_3$ ) and V-source ( $\text{NH}_4\text{VO}_3$ ) fibers to the NN-LVO/NC-Fs is ~78.3%. Consider the fact that a few amount of Li-source ( $\text{LiNO}_3$ ) and V-source ( $\text{NH}_4\text{VO}_3$ ) fibers stick on Al foil after exfoliation, the practical transformation efficiency from the Li-source ( $\text{LiNO}_3$ ) and V-source ( $\text{NH}_4\text{VO}_3$ ) fibers to the NN-LVO/NC-Fs may be higher than 78.3%.

Tab. S1 The weight information of the nanofibers containing of Li- and V-source and the NN-LVO/NC-Fs.

| Experiment reagent        | Solution A                                                                                  | Solution B                                                                                                                                                                               |
|---------------------------|---------------------------------------------------------------------------------------------|------------------------------------------------------------------------------------------------------------------------------------------------------------------------------------------|
|                           | 7.5 mmol $\text{LiNO}_3$ (0.5171 g)<br>1.0 g polyvinylpyrrolidone<br>5 mL dimethylformamide | 2.5 mmol $\text{NH}_4\text{VO}_3$ (0.2925 g)<br>12.5 mmol $\text{H}_2\text{C}_2\text{O}_4 \cdot 2\text{H}_2\text{O}$ (1.5759 g)<br>0.85 g polyvinylpyrrolidone<br>5 mL dimethylformamide |
| Li- and V-source fibers   | 2.6775 g                                                                                    |                                                                                                                                                                                          |
| NN-LVO/NC-Fs              | 0.5191 g                                                                                    |                                                                                                                                                                                          |
| Transformation efficiency | ~78.3 %                                                                                     |                                                                                                                                                                                          |

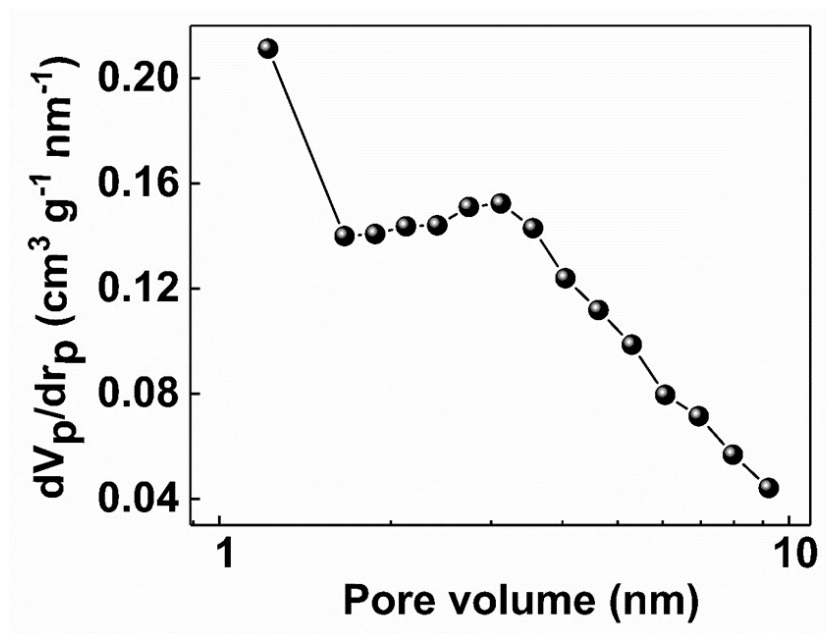

Fig. S2 Pore size distribution of the NN-LVO/NC-Fs.

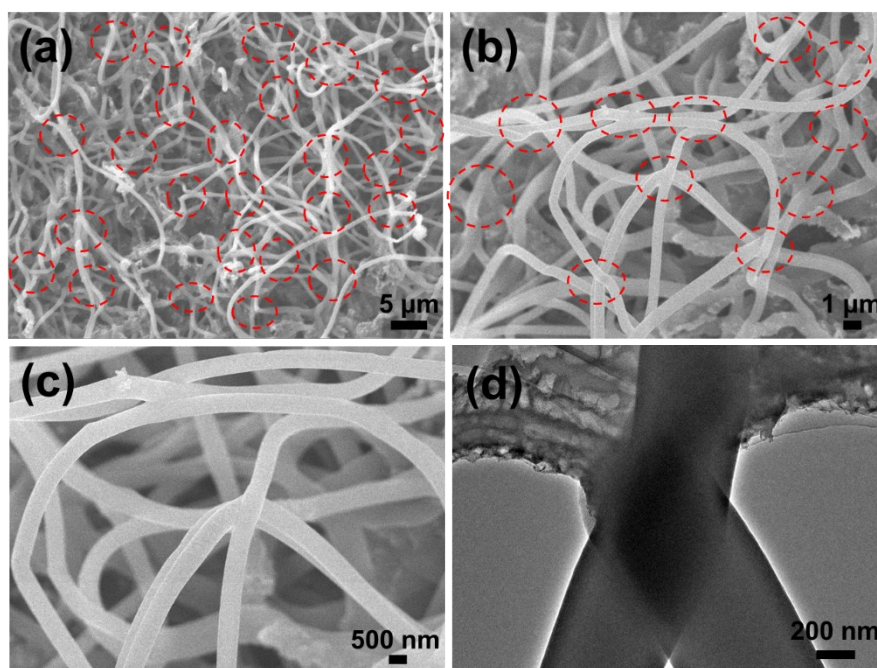

Fig. S3 (a)-(c) SEM and (d) TEM images of the NN-LVO/NC-Fs.

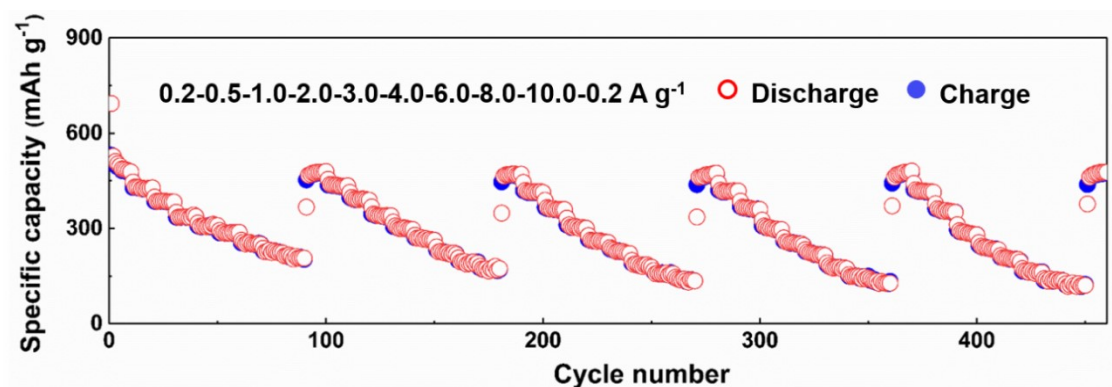

Fig. S4 Rate capability of LVO/NC-Fs electrode obtained via ordinary electrochemical spinning.

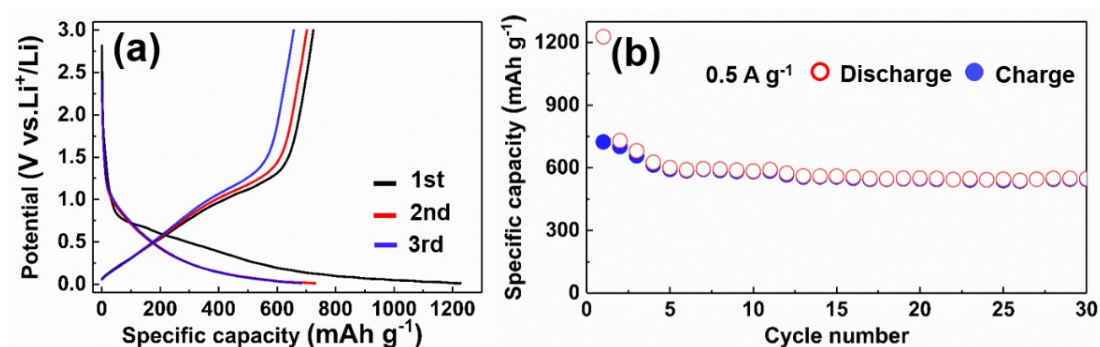

Fig. S5 (a) Charge/discharge curves and (b) capacity retention of N doped carbon fibers obtained without Li- and V-source.

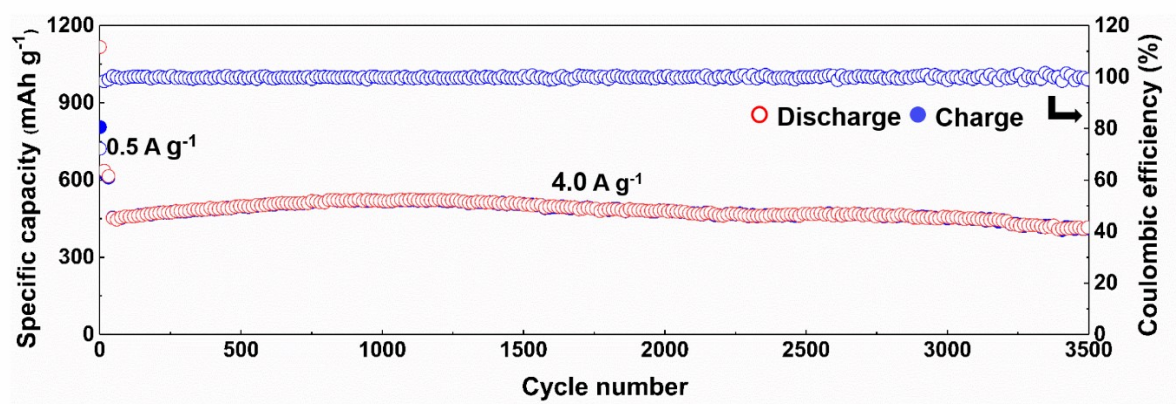

Fig. S6 Long cycle performance of the NN-LVO/NC-Fs electrode.

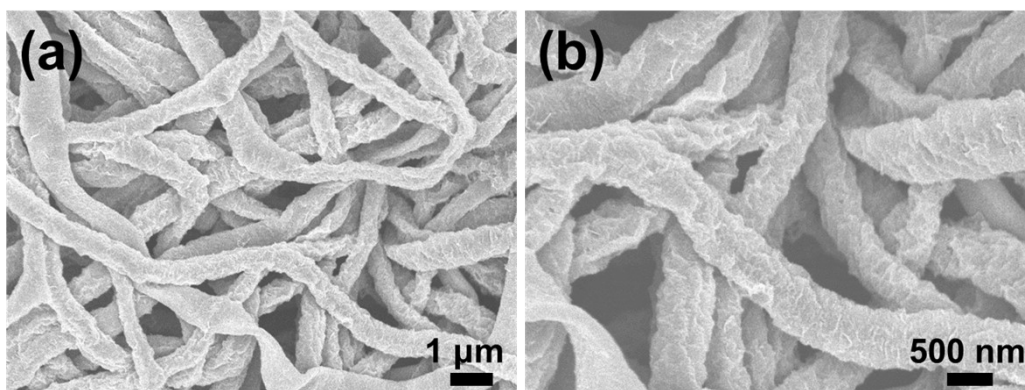

Fig. S7 (a) Low and (b) high magnification SEM images of the LVO/NC-Fs.

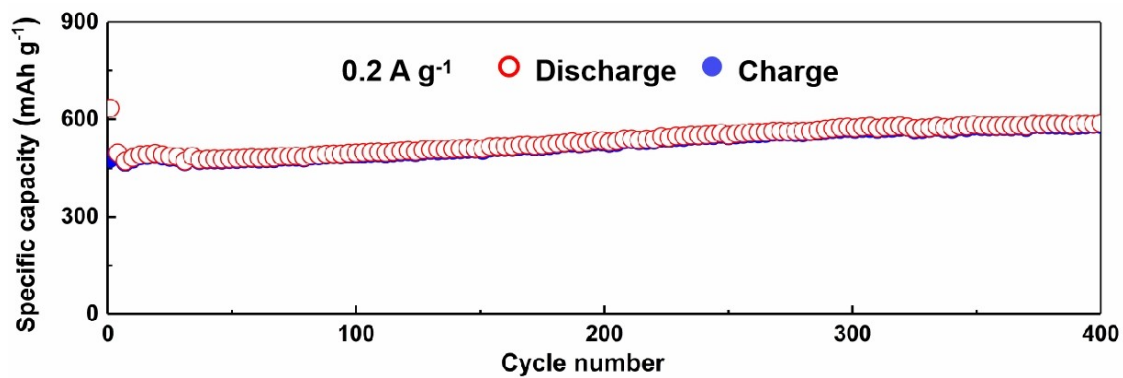

Fig. S8 Capacity retention of LVO/NC-Fs electrode obtained via ordinary electrochemical spinning.

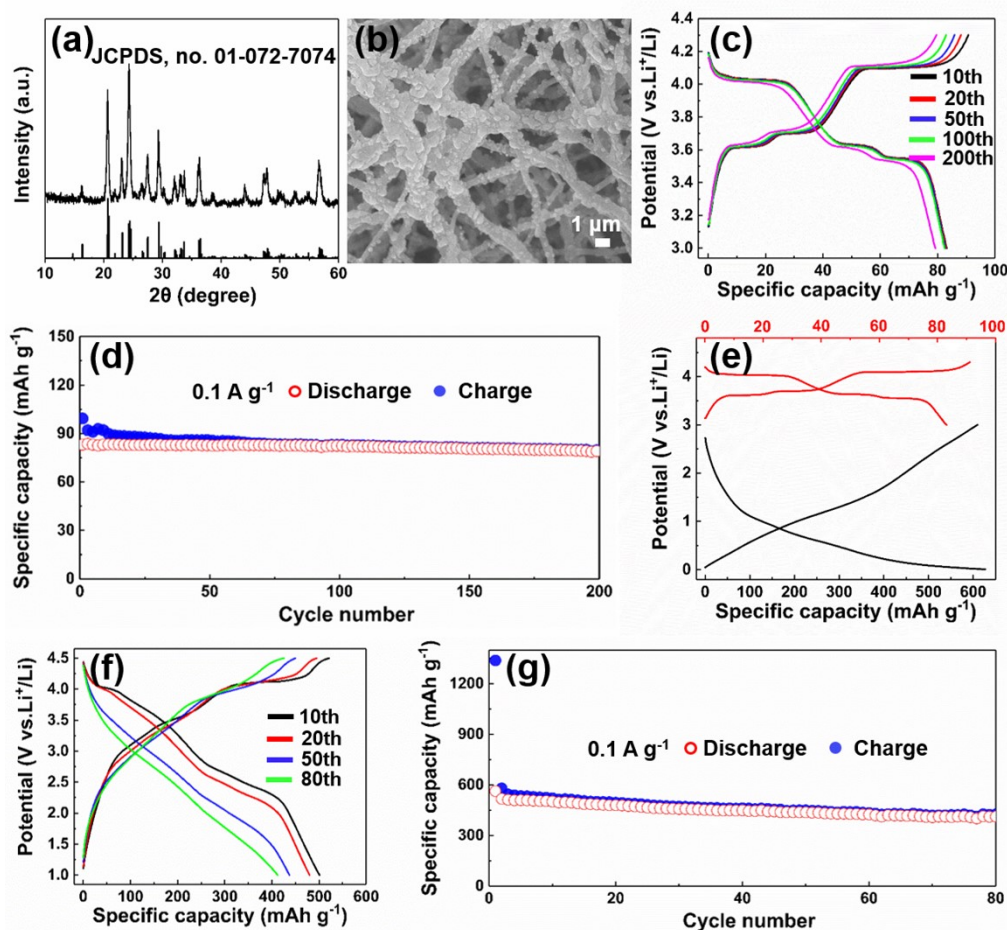

Fig. S9 (a) XRD pattern and (b) SEM image of the LVP/NC Fs. (c) Galvanostatic charge/discharge curves and (d) Cycling performance of the LVP/C Fs electrode at  $0.1 \text{ A g}^{-1}$ . (e) The comparison of capacity and potential between the NN-LVO/NC-Fs and the LVP/C Fs electrode. (f) Representative charge/discharge curves and (g) Cycling performance of the NN-LVO/NC-Fs//LVP/C Fs full cell.
